# Supplementary material
Source: PubMed Central journal article supplement (PMC5479620)
Supplement: c96e4288363b75f44b0c160bad493c12_2016_149500-Disclosures_and_Contributions.pdf [file c96e4288363b75f44b0c160bad493c12_2016_149500-Disclosures_and_Contributions.pdf]

Haematologica  
HAEMATOL/2016/149500  
Version 3

Nocturnal enuresis and K<sup>+</sup> transport in red blood cells from patients  
with sickle cell anaemia

Sanjay Tewari, David C. Rees, Anke Hannemann, Oluwabukola T.  
Gbotosho, Halima W.M. Al Balushi, and John S. Gibson

Disclosures: None.

Contributions: JSG and DCR devised the study and wrote the ms; ST obtained clinical data and carried out statistical analysis; AH carried out flux measurements, sickling assays, phosphatidylserine exposure and data analysis; OTG, HWMA and JSG carried out haemolysis experiments; OTG also carried out some phosphatidylserine measurements.
